# Supplementary material for: Both macronutrient food composition and fasting insulin resistance affect postprandial glycemic responses in senior subjects
Source: Royal Society of Chemistry journal article supplement (doi:10.1039/d1fo00731a), 2021-01-01
Supplement: d1fo00731a1.pdf [file d1fo00731a1.pdf]

**Supplemental Table 1.** Composition of test foods: high Protein Product (Study I) and high CHO Product (Study II).

|                     | <b>Study I<br/>(High Protein Product) a</b> | <b>Study II<br/>(High CHO Product) b</b> |
|---------------------|---------------------------------------------|------------------------------------------|
| Protein (g)         | 22.3                                        | 0.4                                      |
| Fat (g)             | 9.9                                         | 0.3                                      |
| Carbohydrates (g)   | 25.0                                        | 25.0                                     |
| Sugars (g)          | 5.2                                         | 12.4                                     |
| Fructose (g)        | -                                           | 7.7                                      |
| Glucose (g)         | -                                           | 3.4                                      |
| Sucrose (g)         | -                                           | 1.2                                      |
| Maltose (g)         | -                                           | 0.1                                      |
| Total Fibre (g)     | 10.1                                        | 9.1                                      |
| Energy value (Kcal) | 289                                         | 122                                      |

a Values are given as content per portion, i.e., per 100-g High Protein Product including 40 g White Bread

b Values are given as content per portion, i.e., per 192.3-g High CHO Product
